# Supplementary material
Source: PubMed Central journal article supplement (PMC4300242)

Figure S1

A

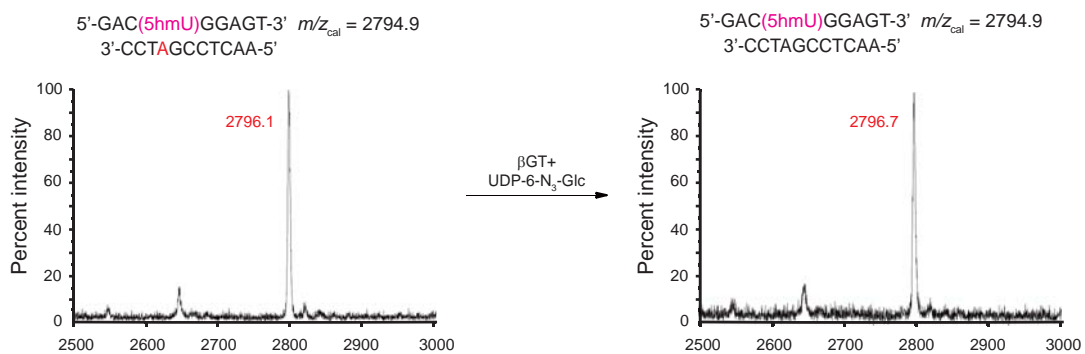

B

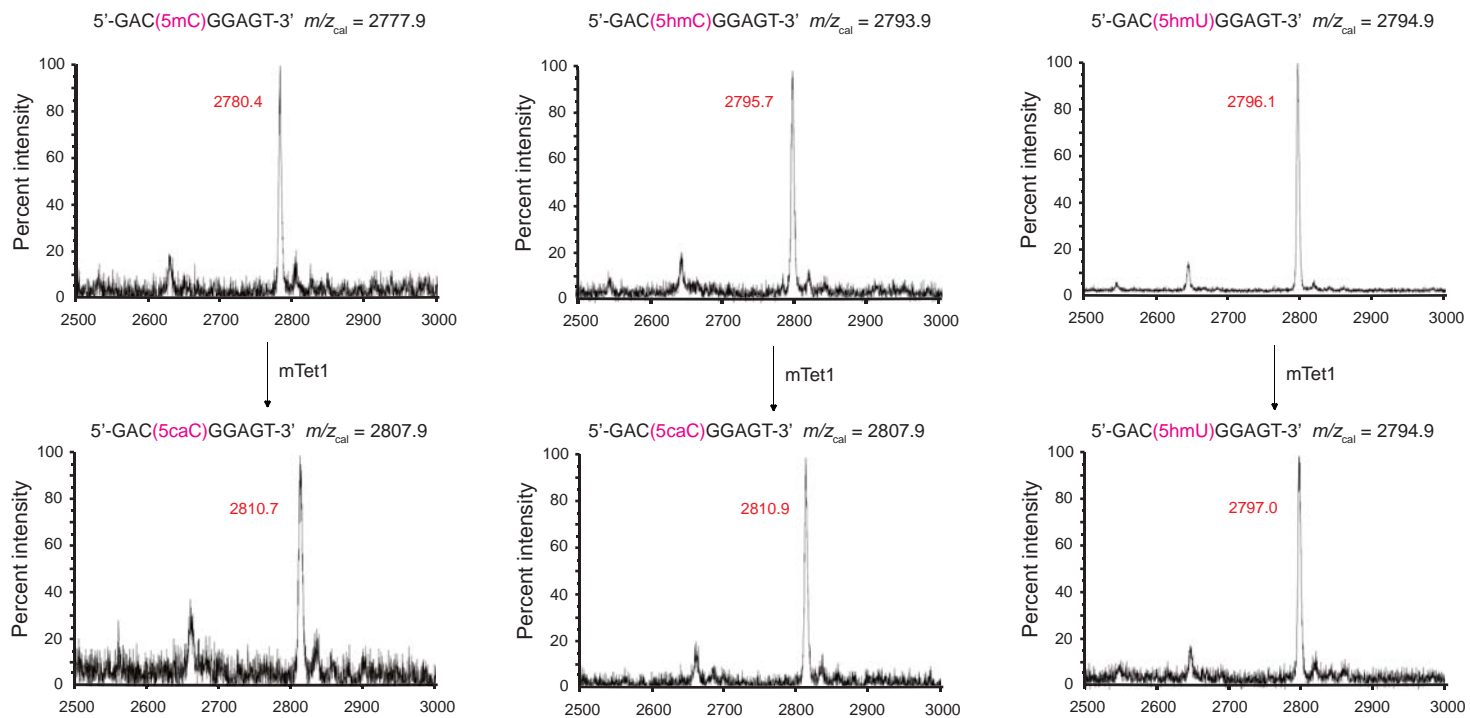

Supplement: NIHMS642733-supplement-1.pdf [file NIHMS642733-supplement-1.pdf]

Figure S2

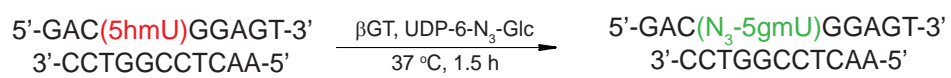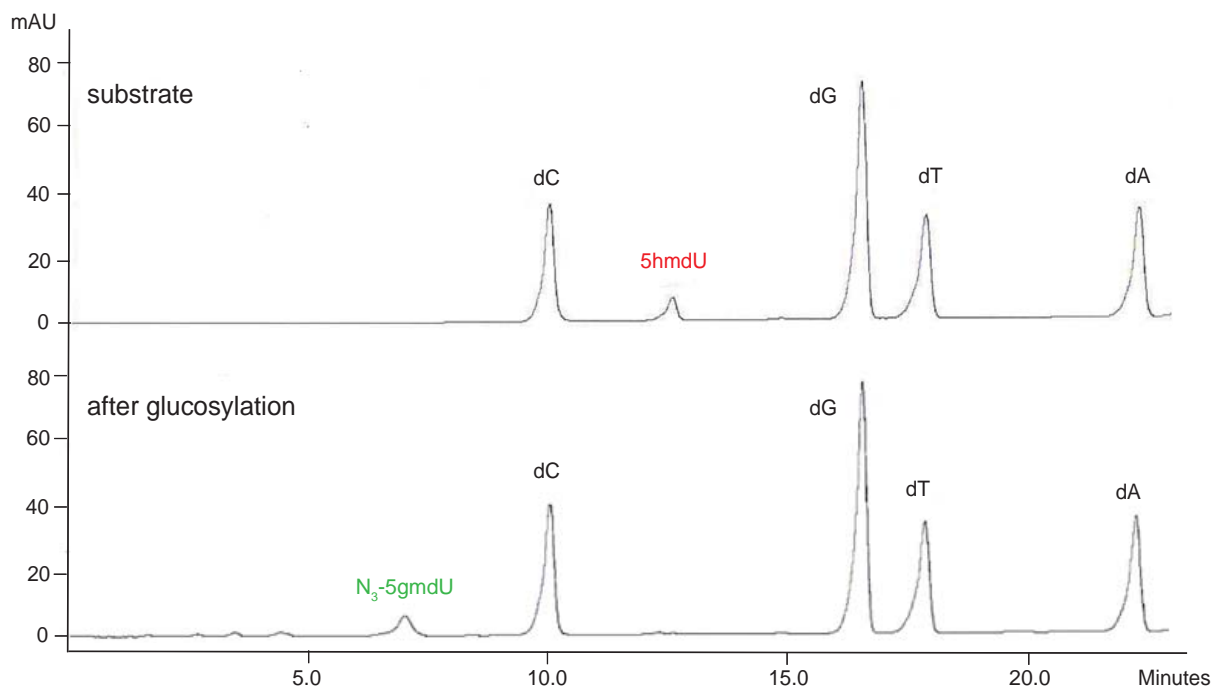

Supplement: NIHMS642733-supplement-2.pdf [file NIHMS642733-supplement-2.pdf]
